# Supplementary material
Source: MDPI journal article supplement (https://www.mdpi.com/2073-4395/12/1/36)
Supplement: s1 [file s1]

Archive with 2 entries (2 files):
- Table S1 - Experimental Design.pdf
- Table S2 - Biostimulant Composition.pdf
