# Supplementary material
Source: MDPI journal article supplement (https://www.mdpi.com/2073-4395/12/1/36)
Supplement: s1 [file s1]

**Table S1.** Amino-acid composition of biostimulants as Protein Hydrolysates from plant (Trainer®) and animal (Isabion®) source.

|                | <b>Trainer®</b>   | <b>Isabion®</b>   |
|----------------|-------------------|-------------------|
|                | g L <sup>-1</sup> | g L <sup>-1</sup> |
| Alanine        | 38                | 59                |
| Arginine       | 58                | 6                 |
| Cysteine       | 8                 | 0                 |
| Glycine        | 37                | 122               |
| Histidine      | 23                | 3                 |
| Isoleucine     | 40                | 6                 |
| Leucine        | 66                | 16                |
| Lysine         | 50                | 20                |
| Methionine     | 12                | 4                 |
| Phenylalanine  | 43                | 12                |
| Proline        | 42                | 63                |
| Serine         | 45                | 2                 |
| Threonine      | 34                | 1                 |
| Tryptophan     | 10                | 0                 |
| Tyrosine       | 32                | 4                 |
| Valine         | 42                | 18                |
| Glutamic acid  | 149               | 55                |
| Aspartic acid  | 97                | 24                |
| Hydroxyproline | 0                 | 43                |
| Ornithine      | 0                 | 28                |
| Hydroxylysine  | 0                 | 8                 |
