# Supplementary material
Source: MDPI journal article supplement (https://www.mdpi.com/2073-4395/12/1/36)
Supplement: s1 [file s1]

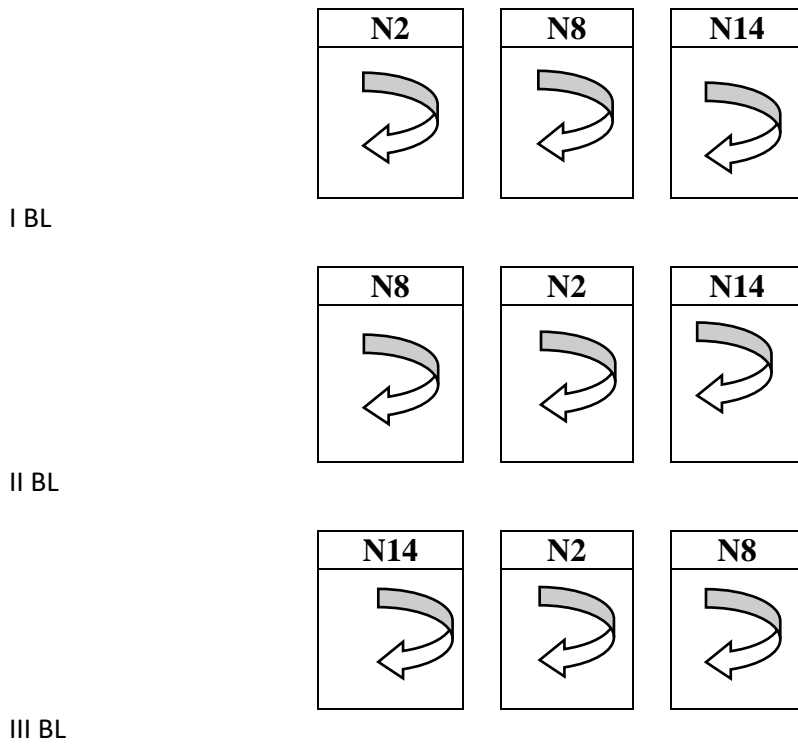

Experimental design: split-plot with three replications (BL)

'N' treatment in the main plot (bench) and 'B' treatment in the sub-plot (tray).

Experimental Unit: 2 polystyrene trays/B

The whole trial consisted of 54 polystyrene trays,  $3 \text{ BL} * 3 \text{ N} * 3 \text{ B} * 2 = 54$
